# Supplementary material for: A Comprehensive Analysis of the Transcriptomes of Marssonina brunnea and Infected Poplar Leaves to Capture Vital Events in Host-Pathogen Interactions
Source: PubMed Central journal article supplement (PMC4519268; doi:10.1371/journal.pone.0134246), 2015-07-29

S1 Fig. Schematic diagram of P relevance calculation for the independent network analysis

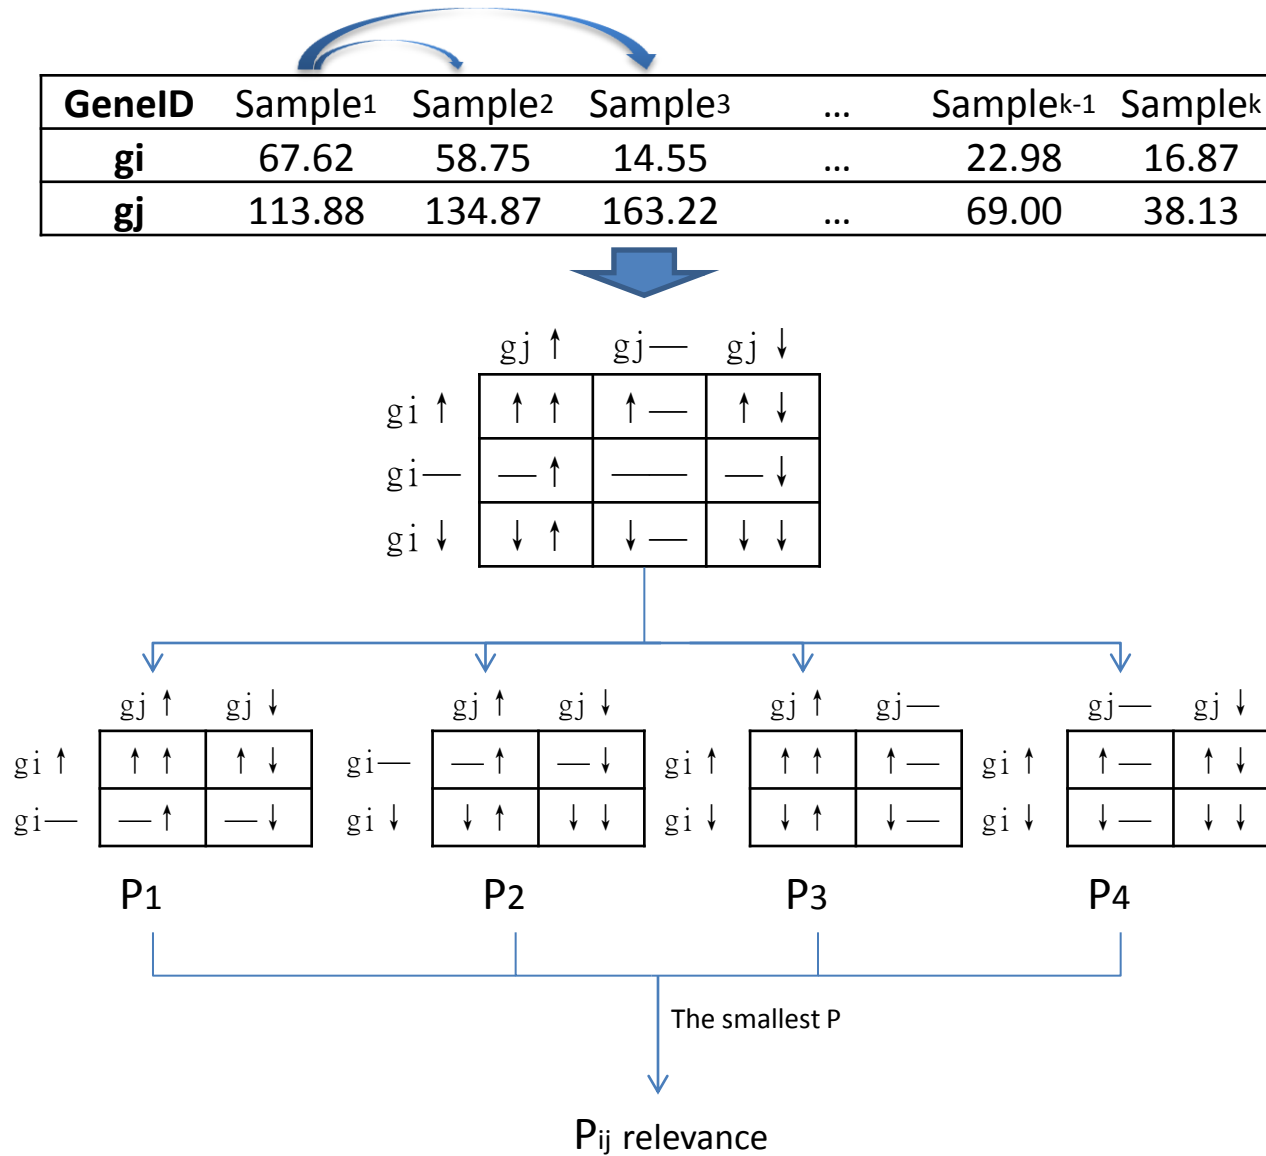

Supplement: pone.0134246.s001.pdf [file pone.0134246.s001.pdf]
