# Supplementary material for: A Comprehensive Analysis of the Transcriptomes of Marssonina brunnea and Infected Poplar Leaves to Capture Vital Events in Host-Pathogen Interactions
Source: PubMed Central journal article supplement (PMC4519268; doi:10.1371/journal.pone.0134246), 2015-07-29

S2 Fig. The NL895 leaves infected with highly active fungi : (A) 96 h and (B) after 96 h

A

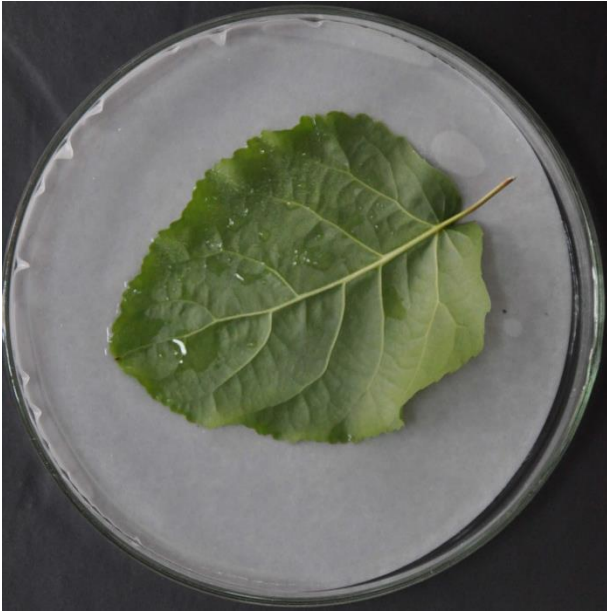

B

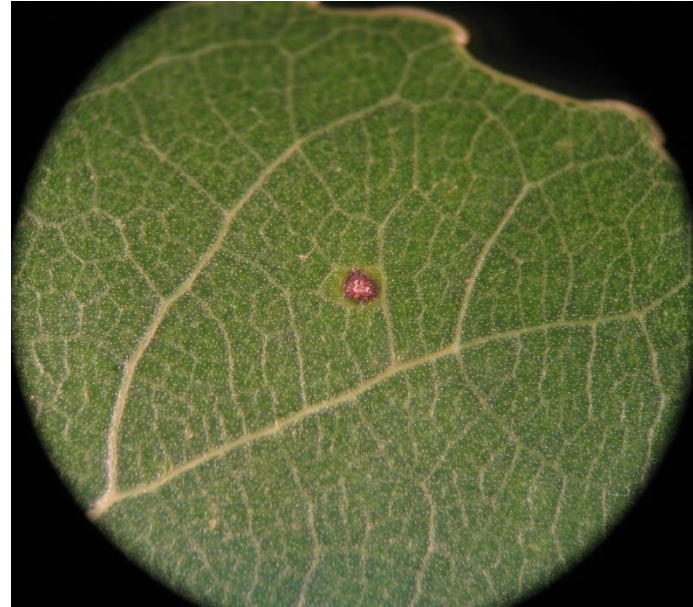

Supplement: pone.0134246.s002.pdf [file pone.0134246.s002.pdf]
