# Supplementary material for: A Comprehensive Analysis of the Transcriptomes of Marssonina brunnea and Infected Poplar Leaves to Capture Vital Events in Host-Pathogen Interactions
Source: PubMed Central journal article supplement (PMC4519268; doi:10.1371/journal.pone.0134246), 2015-07-29

S4 Fig. The detected genes between the 895/highly active and 895/weakly active groups

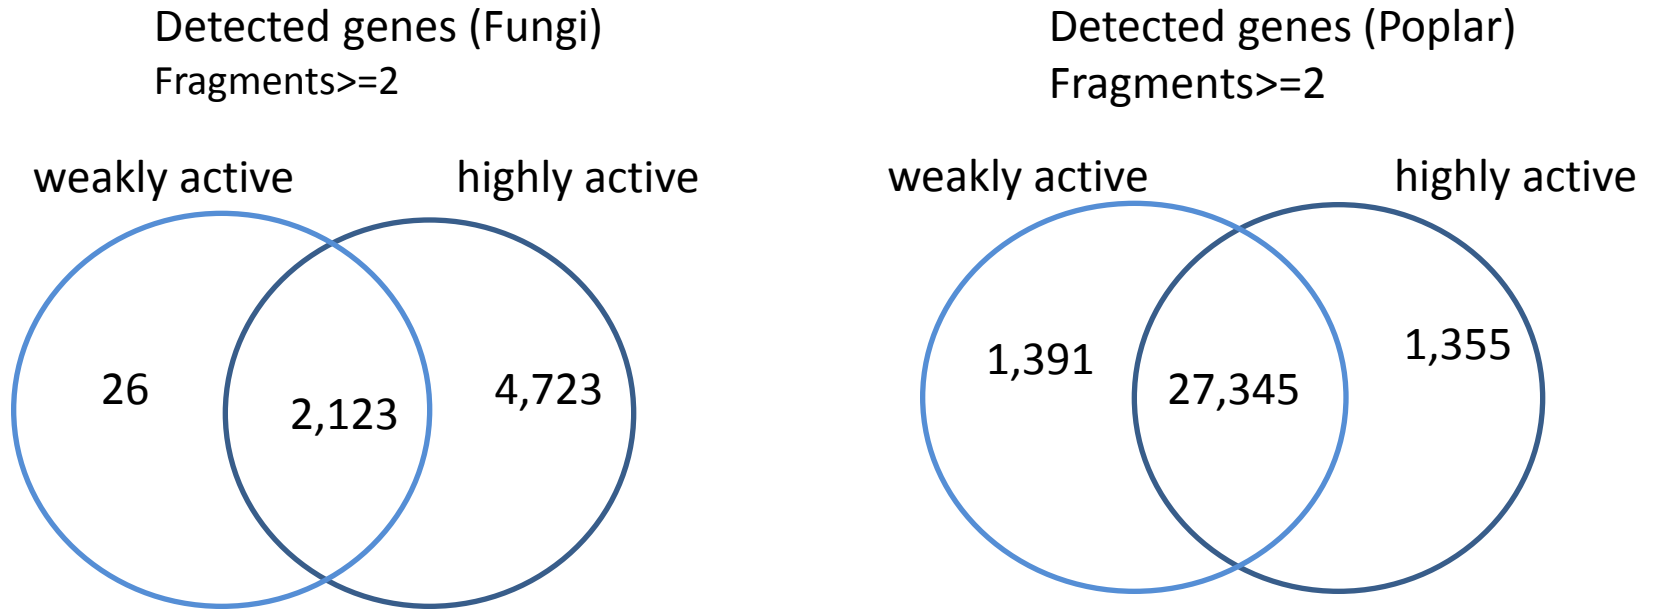

Supplement: pone.0134246.s004.pdf [file pone.0134246.s004.pdf]
