# Supplementary material for: A Comprehensive Analysis of the Transcriptomes of Marssonina brunnea and Infected Poplar Leaves to Capture Vital Events in Host-Pathogen Interactions
Source: PubMed Central journal article supplement (PMC4519268; doi:10.1371/journal.pone.0134246), 2015-07-29
Supplement: pone.0134246.s005.pdf [file pone.0134246.s005.pdf]

S5 Fig. The top 1,000 relationships contained 768 fungi that shared several genes with the preceding DEGs

Fungi DEGs analysis ( $P < 0.01$ , ratio  $> 2$  or  $< 0.5$ )  
8 samples 584 DEGs

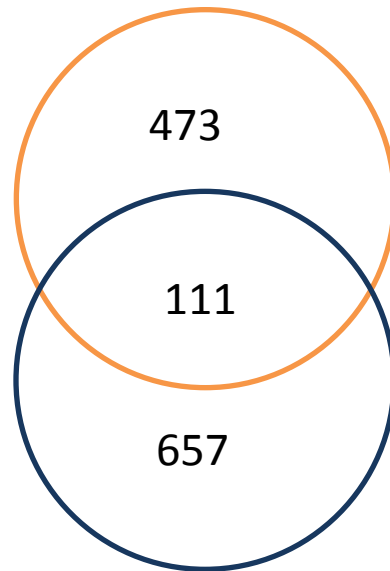

Top 1000 relations from independent network  
10 samples 768 fungi genes
