# Supplementary material for: A Comprehensive Analysis of the Transcriptomes of Marssonina brunnea and Infected Poplar Leaves to Capture Vital Events in Host-Pathogen Interactions
Source: PubMed Central journal article supplement (PMC4519268; doi:10.1371/journal.pone.0134246), 2015-07-29
Supplement: pone.0134246.s006.pdf [file pone.0134246.s006.pdf]

**S1 Table. Statistics for mapped reads and detected genes.**

|                                  | <b>Raw Reads (million pairs)</b> | <b>Length (bp)</b> | <b>Data size (Gbps)</b> | <b>Mapped fragments (poplar)</b> | <b>Detected gene<sup>a</sup> (poplar)</b> | <b>Mapped fragments (fungi)</b> | <b>Detected genes (fungi)</b> |
|----------------------------------|----------------------------------|--------------------|-------------------------|----------------------------------|-------------------------------------------|---------------------------------|-------------------------------|
| <b>214_High_48 h<sup>b</sup></b> | 9.4                              | 151                | 2.8                     | 3,332,423                        | 23,840                                    | 16,928                          | 1,502                         |
| <b>214_High_96 h</b>             | 10.1                             | 151                | 3.0                     | 4,765,384                        | 24,569                                    | 15,304                          | 1,632                         |
| <b>214_Weak_24 h<sup>c</sup></b> | 22.7                             | 100                | 4.5                     | 13,089,007                       | 25,596                                    | 13,339                          | 1,087                         |
| <b>895_High_12 h</b>             | 14.4                             | 100                | 2.9                     | 10,014,506                       | 26,474                                    | 92,717                          | 5,250                         |
| <b>895_High_48 h</b>             | 15                               | 100                | 3.0                     | 10,738,751                       | 26,220                                    | 69,963                          | 5,026                         |
| <b>895_High_96 h</b>             | 17.8                             | 100                | 3.6                     | 11,333,846                       | 26,003                                    | 145,303                         | 6,148                         |
| <b>895_Weak_6 h</b>              | 13.1                             | 100                | 2.6                     | 9,743,550                        | 27,040                                    | 11,504                          | 1,338                         |
| <b>895_Weak_24 h</b>             | 11.5                             | 100                | 2.3                     | 8,071,463                        | 26,250                                    | 10,666                          | 1,281                         |
| <b>895_Weak_72 h</b>             | 12.8                             | 100                | 2.6                     | 8,716,076                        | 25,177                                    | 5,347                           | 649                           |

<sup>a</sup> The criterion for “detected gene” was that the mapped fragments were not less than 2.

<sup>b</sup> “High” means infected with highly active fungi.

<sup>c</sup> “Weak” means infected with weakly active fungi.
