# Supplementary material for: A Comprehensive Analysis of the Transcriptomes of Marssonina brunnea and Infected Poplar Leaves to Capture Vital Events in Host-Pathogen Interactions
Source: PubMed Central journal article supplement (PMC4519268; doi:10.1371/journal.pone.0134246), 2015-07-29
Supplement: pone.0134246.s007.pdf [file pone.0134246.s007.pdf]

S2 Table. The distribution of DE-DR genes in sub-categories between the 895/highly active and 895/weakly active groups.

| Disease-resistance protein                                                                                | Total | 895/weakly active                  | 895/highly active      |
|-----------------------------------------------------------------------------------------------------------|-------|------------------------------------|------------------------|
|                                                                                                           |       | 6 h 24 h 72 h<br>U(D) <sup>a</sup> | 12 h 48 h 96 h<br>U(D) |
| <b>NB-ARC domain-containing disease-resistance protein</b>                                                | 329   | 3(50)                              | 26(29)                 |
| <b>Disease-resistance protein (TIR-NBS-LRR class) family</b>                                              | 143   | 0(44)                              | 10(8)                  |
| <b>Disease-resistance family protein/LRR family protein</b>                                               | 18    | 0(2)                               | 2(0)                   |
| <b>Disease-resistance protein (CC-NBS-LRR class) family</b>                                               | 33    | 0(8)                               | 2(4)                   |
| <b>Disease-resistance protein (TIR class), putative</b>                                                   | 2     | 0(2)                               | 0(1)                   |
| <b>Disease-resistance protein (TIR-NBS class)</b>                                                         | 13    | 0(1)                               | 1(0)                   |
| <b>Disease-resistance protein (TIR-NBS class), putative</b>                                               | 3     | 0(1)                               | 0(0)                   |
| <b>Disease-resistance protein (TIR-NBS-LRR class)</b>                                                     | 13    | 0(4)                               | 2(0)                   |
| <b>Disease-resistance protein (TIR-NBS-LRR class), putative</b>                                           | 68    | 0(16)                              | 2(3)                   |
| <b>Disease-resistance-responsive (dirigent-like protein) family protein</b>                               | 42    | 3(4)                               | 1(5)                   |
| <b>DZC (Disease resistance/zinc finger/chromosome condensation-like region) domain-containing protein</b> | 4     | 0(0)                               | 0(0)                   |
| <b>ENHANCED DISEASE RESISTANCE 2</b>                                                                      | 3     | 0(2)                               | 0(0)                   |
| <b>LRR and NB-ARC domains-containing disease-resistance protein</b>                                       | 90    | 1(15)                              | 4(8)                   |
| <b>Total</b>                                                                                              | 761   | 8(148)                             | 50(58)                 |
| <b>Total DEGs</b>                                                                                         |       | 10,375                             | 7,089                  |

<sup>a</sup>U, up-regulated; D, down-regulated
